# Supplementary material for: A microbially-driven and depth-explicit soil organic carbon model constrained by carbon isotopes to reduce equifinality
Source: Copernicus journal article supplement (doi:10.5194/egusphere-2024-2205), 2024-07-23
Supplement: Supplementary file 1 [file egusphere-2024-2205-supplement-version2.zip]

## Sheet: Hainich
Depth (m)	OC_fLF	OC_HF	d13C_fLF	d13C_HF	d14C_fLF	d14C_HF	Upper depth	Lower depth				d13C total	d14C total	Root biomass					OC_fLF stDev	OC_HF stDev	d13C_fLF stDev	d13C_HF stDev	d14C_fLF stDev	d14C_HF stDev
Litter	0.58		-29.2		98.7333											> C stock for litter OC (kg OC m-2)			0.291131	3.49978
0.025	0.490607	5.5915	-27.9493	-26.913	124.192	90.886	0	0.05				-26.9966	93.5726	0.925958					0.135062	2.92764	0.783026	0.195597	44.1917	21.0047
0.075	0.146764	3.72148	-27.729	-26.2565			0.05	0.1				-26.3124		0.614262					0.0313493	1.29864	0.333525	0.257095
0.15	0.0428751	2.18942	-27.7447	-25.7856	70.8233	-40.29	0.1	0.2				-25.8233	-38.1559	0.724038					0.0140065	0.618813	0.645494	0.20918	32.052	39.3423
0.25	0.0295918	1.43256	-27.6735	-25.6072			0.2	0.3				-25.649		0.376213					0.0115199	0.359426	0.544371	0.435032
0.35	0.0199407	0.908579	-27.5496	-25.4883	53.7467	-209.977	0.3	0.4				-25.5325	-204.313	0.172558					0.0410017	0.472627	1.03813	0.491833	48.5599	63.4221
0.45	0.0315198	0.460526	-27.6975	-25.1178			0.4	0.5				-25.2098		0.170273					0.0520464	0.428084	0.557033	0.640198
0.55	0.0236167	0.370384	-27.8454	-25.8352			0.5	0.6				-25.9557		0.166839							0.567857	0.902811

## Sheet: Hainich_old
Depth (m)	OC_fLF	OC_HF	d13C_fLF	d13C_HF	d14C_fLF	d14C_HF	Upper depth	Lower depth				d13C total	d14C total	Root biomass
Litter	0.3		-29.4		98.7333											> C stock for litter OC (kg OC m-2)
0.025	0.896442	5.5915	-28.1124	-26.913	115.74	90.886	0	0.05				-27.0788	94.3201	0.925958
0.075	0.312769	3.72148	-27.8747	-26.2565			0.05	0.1				-26.382		0.614262
0.15	0.153727	2.18942	-27.7478	-25.7856	5.7767	-40.29	0.1	0.2				-25.9144	-37.2677	0.724038
0.25	0.138229	1.43256	-27.5175	-25.6072			0.2	0.3				-25.7753		0.376213
0.35	0.105824	0.908579	-27.3688	-25.4883	-56.6076	-209.977	0.3	0.4				-25.6844	-193.977	0.172558
0.45	0.103877	0.460526	-27.0514	-25.1178			0.4	0.5				-25.4736		0.170273
0.55	0.0775824	0.370384	-28.3661	-25.8352			0.5	0.6				-26.2735		0.166839

## Sheet: Hesse
Depth (m)	OC_fLF	OC_HF	d13C_fLF	d13C_HF	d14C_fLF	d14C_HF	Upper depth	Lower depth	OC_oLF	d13C_oLF	d14C_oLF
0.025	0.584505	2.22921	-28.2788	-26.98	139.985	88.19	0	0.05	0.413763	-29.0281	122.01
0.075	0.202519	1.42093	-28.3009	-26.4002			0.05	0.1	0.257542	-29.1361
0.15	0.186458	1.03982	-28.4303	-26.2957	116.178	5.6	0.1	0.2	0.207845	-29.2092	24.954
0.25	0.178292	0.7507	-28.2886	-26.0329			0.2	0.3	0.0954225	-29.0261
0.35	0.0619612	0.49704	-28.367	-25.7191	115.007	-120.06	0.3	0.4	0.0477012	-28.7091	8.53333
0.45	0.0450639	0.27887	-28.3507	-25.2208			0.4	0.5	0.0164438	-29.3944

## Sheet: Judgeford
1959
Depth (m)	OC%	d13C	d14C
0.0376	7.1	-27.5	-34.9
0.1382	4.2	-27.1	-44
0.2307
0.3781	1.9	-26	-140.2
0.5162
0.5847	1	-26.1	-350
0.668
0.8166	0.7	-24.9	-457.1
1.0472	0.7	-24.5	-500
1974
Depth (m)	OC%	d13C	d14C
0.0439161	6.32	-27.4	152.2
0.146816	2.62	-27.2	24
0.2758	1.61	-26.9	-65
0.4183	1.39	-26.7	-103.7
0.56545	0.96	-25.8	-160
0.71245	0.55	-25.9	-250
0.8528	0.63	-25.4	-311
0.99535	0.49	-24.4	-427.8
1.13775	0.44	-24.5	-506.6
1.27389	0.37		-564.1
2002
Depth (m)	OC%	d13C	d14C
0.017	6.26	-28	89.7
0.08985	4.61	-27.7	85.5
0.20315	2.64	-27.1	4.3
0.3534	1.35	-26.5	-88.3
0.62175	0.95	-26	-156.1
0.93305	0.49	-24.3	-253.1
1.13665	0.43	-24.7	-448.8
1.2728	0.43

## Sheet: Feno_forest
Depth (m)	OC	d13C	d14C	Upper depth	Lower depth
Litter
0.025	2.57018	-26.2836		0	0.05
0.075	1.64916	-25.7733	-3.67	0.05	0.1
0.125	1.46849	-25.5871		0.1	0.15
0.175	0.963697	-24.4006		0.15	0.2
0.225	0.889661	-24.44	-143.8	0.2	0.25
0.275	0.815072	-24.3144		0.25	0.3
0.325	0.794911	-24.0947		0.3	0.35
0.375	0.620719	-24.0399		0.35	0.4
0.425	0.68925	-23.8262		0.4	0.45
0.475	0.660091	-23.8491		0.45	0.5
0.525	0.681362	-23.7008	-480.7	0.5	0.55
0.575	0.621621	-23.3746		0.55	0.6
0.625	0.497967	-24.1746		0.6	0.65
0.675	0.41304	-22.5593		0.65	0.7
0.725	0.387043	-22.787		0.7	0.75
0.775	0.319786	-23.0095		0.75	0.8
0.825	0.311241	-23.1872		0.8	0.85
0.875	0.274736	-23.2302		0.85	0.9
0.925	0.268281	-23.1287		0.9	0.95
0.975	0.268901	-23.9621	-701.73	0.95	1

## Sheet: Feno_grassland
Depth (m)	OC	d13C	d14C	Upper depth	Lower depth
Litter
0.025	1.09877	-17.6629		0	0.05
0.075	0.844629	-19.9799	-246.6	0.05	0.1
0.125	0.669594	-20.5189		0.1	0.15
0.175	0.78062	-20.7451		0.15	0.2
0.225	0.658402	-20.7505	-338.3	0.2	0.25
0.275	0.666161	-21.6415		0.25	0.3
0.325	0.523298	-21.2546		0.3	0.35
0.375	0.538533	-20.9088		0.35	0.4
0.425	0.505379	-22.2647		0.4	0.45
0.475	0.532681	-21.3803		0.45	0.5
0.525	0.501894	-20.1525	-454.5	0.5	0.55
0.575	0.468238	-20.6174		0.55	0.6
0.625	0.468608	-20.9245		0.6	0.65
0.675	0.4167	-20.4125		0.65	0.7
0.725	0.459042	-21.4122		0.7	0.75
0.775	0.371862	-21.3338		0.75	0.8
0.825	0.452097	-22.3432		0.8	0.85
0.875	0.37318	-21.6588		0.85	0.9
0.925	0.417493	-22.7744		0.9	0.95
0.975	0.360985	-22.1972	-543	0.95	1
